# Supplementary material
Source: MDPI journal article supplement (https://www.mdpi.com/1996-1073/16/19/6932)
Supplement: s1 [file s1]

## Supporting Information

# Pyrolysis and Combustion Behavior of Flax Straw as Biomass: Evaluation of Kinetic, Thermodynamic Parameters, and Qualitative Analysis of Degradation Products

Bahareh Vafakisha <sup>1</sup>, Amin Babaei-Ghazvini <sup>1</sup>, Mahmood Ebadian <sup>2</sup> and Bishnu Acharya <sup>1,\*</sup>

<sup>1</sup> Department of Chemical and Biological Engineering, University of Saskatchewan, 57 Campus Drive, Saskatoon, SK S7N 5A9, Canada; bahareh.vafakish@usask.ca (B.V.); amin.babaei@usask.ca (A.B.-G.)

<sup>2</sup> Prairie Clean Energy, 2221 Cornwall Street, Regina, SK S4P 0X9, Canada; mahmood.ebadian@prairiecleanenergy.com

\* Correspondence: bishnu.acharya@usask.ca

## Contents

|                                                                                                                                          |                                      |
|------------------------------------------------------------------------------------------------------------------------------------------|--------------------------------------|
| <b>Table S1:</b> list of elements presents in ash of flax straw biomass .....                                                            | 2                                    |
| <b>Table S2:</b> Intercept and slope of pyrolysis and combustion of flax straw biomass from Friedman, KAS, and OFW methods.....          | 2                                    |
| <b>Table S3:</b> Differential and integral forms of kinetic models used in solid-state kinetic.....                                      | 3                                    |
| <b>Figure S1:</b> Calculation of $T_i$ and $T_f$ (Black Line: Tangent line).....                                                         | 4                                    |
| <b>Figure S2:</b> 3D FT-IR profiles of the evolved gases released from flax straw during pyrolysis focused spectra in each region. ....  | 8                                    |
| <b>Figure S3:</b> 3D FT-IR profiles of the evolved gases released from flax straw during pyrolysis (time based).....                     | 8                                    |
| <b>Figure S4:</b> 3D FT-IR profiles of the evolved gases released from flax straw during combustion focused spectra in each region ..... | 12                                   |
| <b>Figure S5:</b> 3D FT-IR profiles of the evolved gases released from flax straw during combustion (time based).....                    | <b>Error! Bookmark not defined.2</b> |

**Table S1:** list of elements presents in ash of flax straw biomass

| Type of Elements | wt%  |
|------------------|------|
| Mg               | 4.9  |
| Al               | 0.9  |
| Si               | 37.2 |
| P                | 3.8  |
| S                | 1.3  |
| Cl               | 3.6  |
| Cu               | 0.1  |
| Fe               | 1.6  |
| Mn               | 0.3  |
| Ti               | 0.1  |
| K                | 26.1 |
| Ca               | 19.9 |
| Sr               | 0.1  |

**Table S2:** Intercept and slope of pyrolysis and combustion of flax straw biomass from Friedman, KAS, and OFW methods

| Kinetic Method | Conversion ( $\alpha$ ) | Pyrolysis |        | Combustion |        |
|----------------|-------------------------|-----------|--------|------------|--------|
|                |                         | intercept | slope  | intercept  | slope  |
| Freidman       | 0.1                     | 32.6      | -19972 | 94.6       | -53042 |
|                | 0.2                     | 36.4      | -22595 | 102.9      | -60071 |
|                | 0.3                     | 41.5      | -26268 | 62.5       | -40285 |
|                | 0.4                     | 31.4      | -20691 | 71.9       | -44539 |
|                | 0.5                     | 22.2      | -15510 | 52.9       | -33829 |
|                | 0.6                     | 14.4      | -10938 | 135.2      | -85262 |
| KAS            | 0.1                     | 6.8       | -9640  | 38.0       | -26193 |
|                | 0.2                     | 14.6      | -14569 | 50.0       | -34315 |
|                | 0.3                     | 20.2      | -18339 | 26.5       | -22515 |
|                | 0.4                     | 14.9      | -15587 | 35.3       | -27349 |
|                | 0.5                     | 17.3      | -17526 | 29.6       | -24476 |
|                | 0.6                     | 10.2      | -13383 | 36.8       | -29303 |
| OFW            | 0.1                     | 22.2      | -11117 | 66.2       | -34564 |
|                | 0.2                     | 30.1      | -16149 | 86.7       | -47809 |
|                | 0.3                     | 33.8      | -18803 | 70.8       | -39741 |
|                | 0.4                     | 29.8      | -16834 | 66.1       | -38073 |
|                | 0.5                     | 31.3      | -18262 | 64.9       | -38052 |
|                | 0.6                     | 24.8      | -14416 | 70.7       | -42225 |

**Table S3:** Differential and integral forms of kinetic models used in solid-state kinetic.

| Model Code                       | Differential Form, $f(\alpha)$             | Integral Form, $g(\alpha)$               |
|----------------------------------|--------------------------------------------|------------------------------------------|
| F <sub>1</sub>                   | $(1 - \alpha)$                             | $-\ln(1 - \alpha)$                       |
| F <sub>2</sub>                   | $(1 - \alpha)^2$                           | $(1 - \alpha)^{-1} - 1$                  |
| G <sub>1</sub>                   | $1 - \{2(1 - \alpha)\}$                    | $1 - (1 - \alpha)^2$                     |
| G <sub>2</sub>                   | $1/[3(1 - \alpha)^2]$                      | $1 - (1 - \alpha)^3$                     |
| P <sub>2</sub>                   | $2\alpha^{1/2}$                            | $\alpha^{1/2}$                           |
| P <sub>3</sub>                   | $3\alpha^{2/3}$                            | $\alpha^{1/3}$                           |
| P <sub>4</sub>                   | $4\alpha^{3/4}$                            | $\alpha^{1/4}$                           |
| A <sub>1</sub> (F <sub>1</sub> ) | $(1 - \alpha)$                             | $-\ln(1 - \alpha)$                       |
| Avrami–Erofeev A <sub>2</sub>    | $2(1 - \alpha)[-\ln(1 - \alpha)]^{1/2}$    | $[-\ln(1 - \alpha)]^{1/2}$               |
| Avrami–Erofeev A <sub>3</sub>    | $3(1 - \alpha)[-\ln(1 - \alpha)]^{2/3}$    | $[-\ln(1 - \alpha)]^{1/3}$               |
| Avrami–Erofeev A <sub>4</sub>    | $4(1 - \alpha)[-\ln(1 - \alpha)]^{3/4}$    | $[-\ln(1 - \alpha)]^{1/4}$               |
| A <sub>3/2</sub>                 | $3/2(1 - \alpha)[-\ln(1 - \alpha)]^{1/3}$  | $[-\ln(1 - \alpha)]^{2/3}$               |
| A <sub>1/2</sub>                 | $1/2(1 - \alpha)[-\ln(1 - \alpha)]^{(-1)}$ | $[-\ln(1 - \alpha)]^2$                   |
| A <sub>1/3</sub>                 | $1/3(1 - \alpha)[-\ln(1 - \alpha)]^{(-2)}$ | $[-\ln(1 - \alpha)]^3$                   |
| D <sub>1</sub>                   | $1/(2\alpha)$                              | $\alpha^2$                               |
| D <sub>2</sub>                   | $[-\ln(1 - \alpha)]^{-1}$                  | $[(1 - \alpha)\ln(1 - \alpha)] + \alpha$ |
| R <sub>1</sub>                   | 1                                          | $\alpha$                                 |
| R <sub>2</sub>                   | $2(1 - \alpha)^{1/2}$                      | $[1 - (1 - \alpha)^{1/2}]$               |
| R <sub>3</sub>                   | $3(1 - \alpha)^{2/3}$                      | $[1 - (1 - \alpha)^{1/3}]$               |

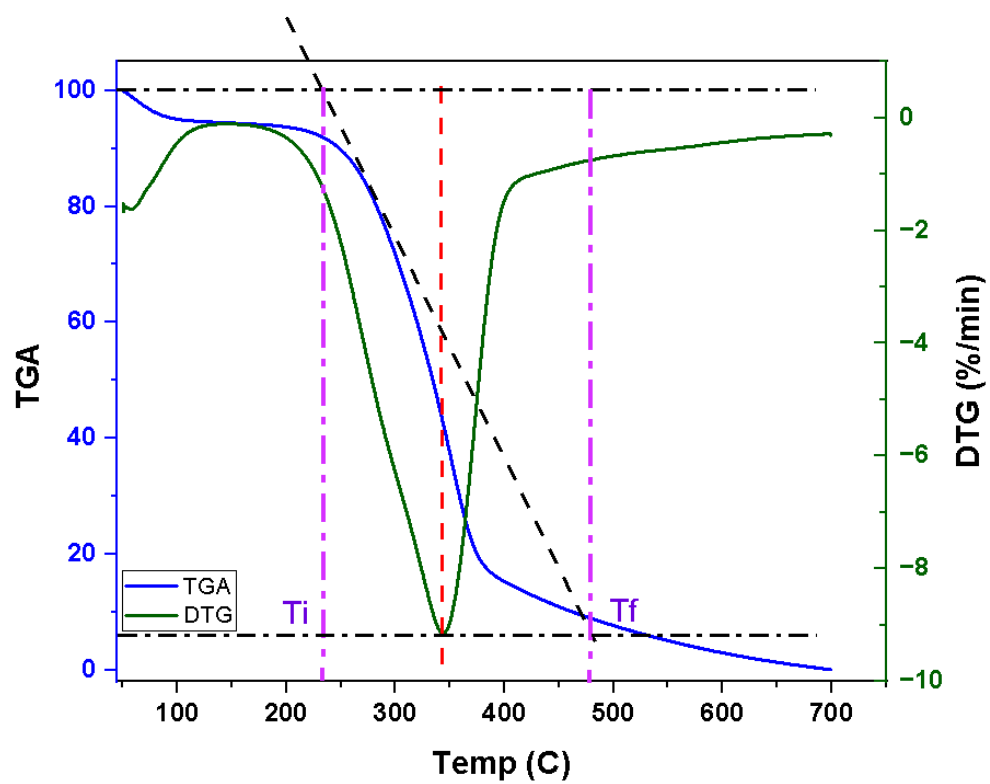

Figure S1: Calculation of  $T_i$  and  $T_f$  (Black Line: Tangent line)

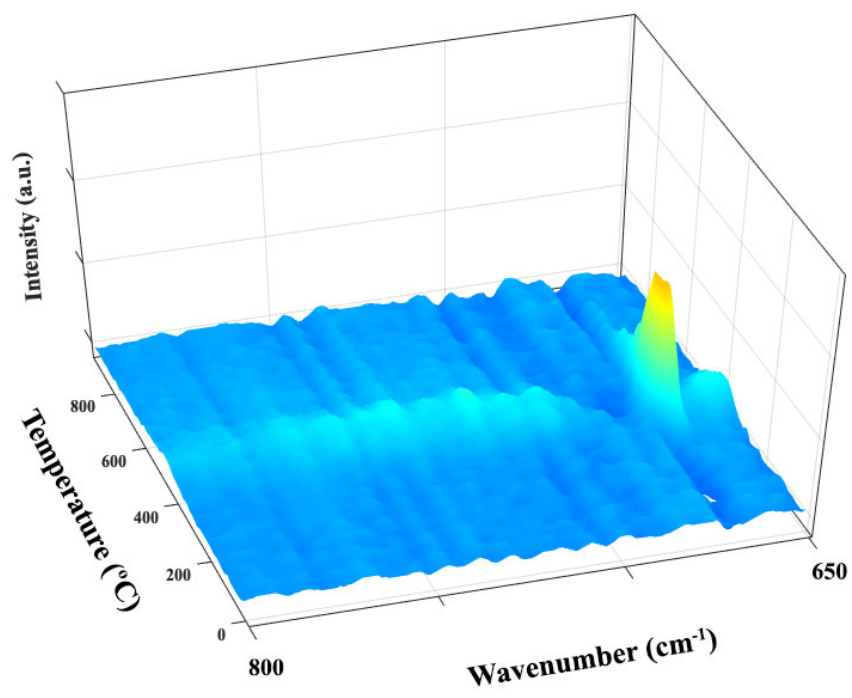

(a) 650-800  $\text{cm}^{-1}$  aromatic Region

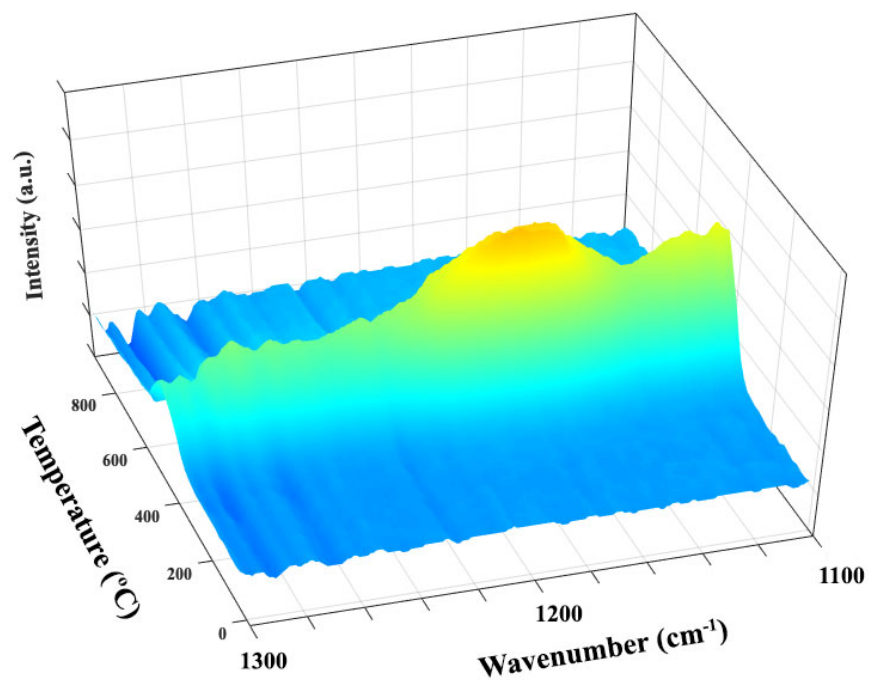

(b) 1100-1300  $\text{cm}^{-1}$  Ethers and Alcohols

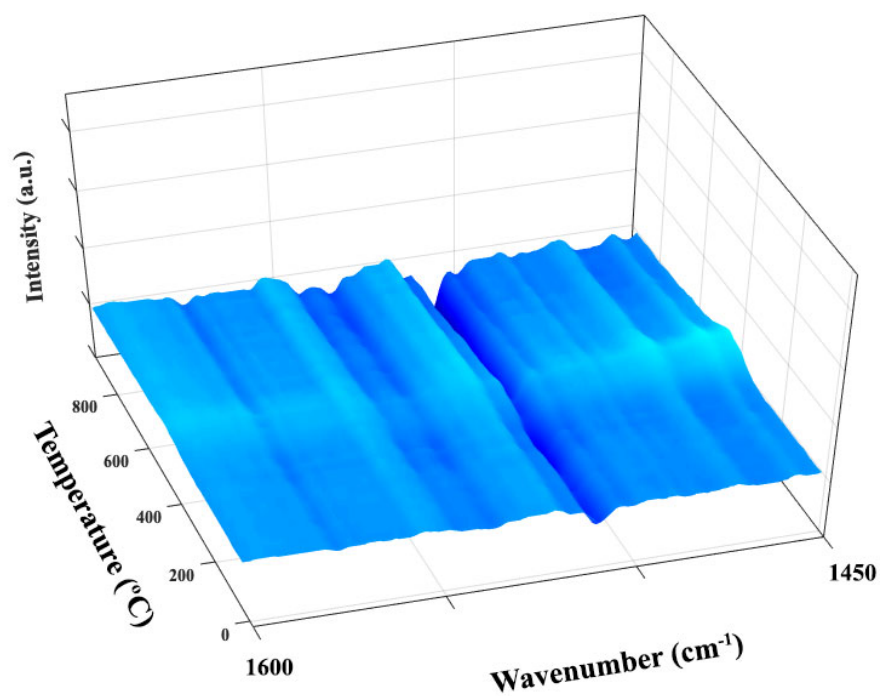

(c) 1450-1600  $\text{cm}^{-1}$  Aromatics

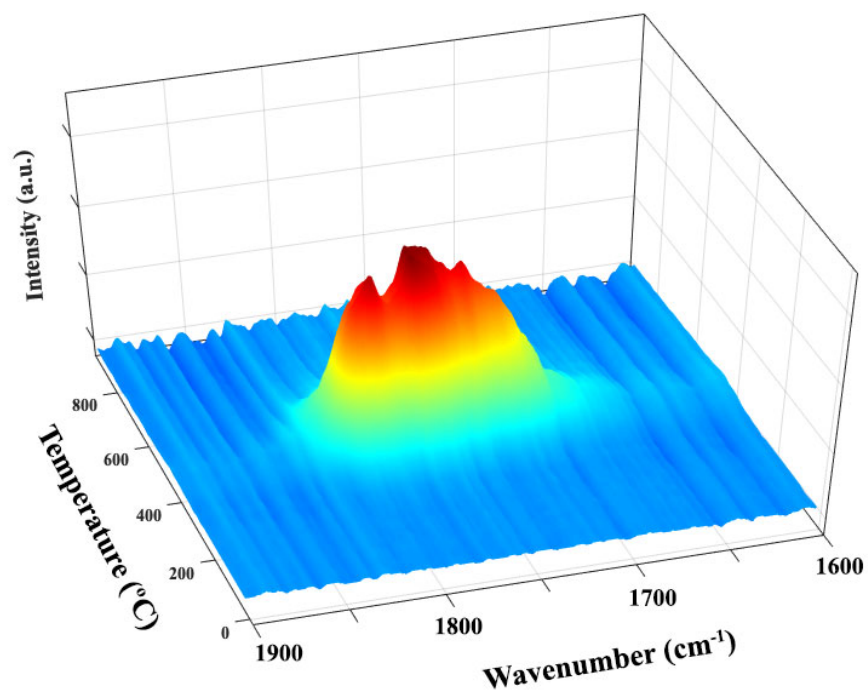

(d) 1600-1900  $\text{cm}^{-1}$  Carboxylic acids

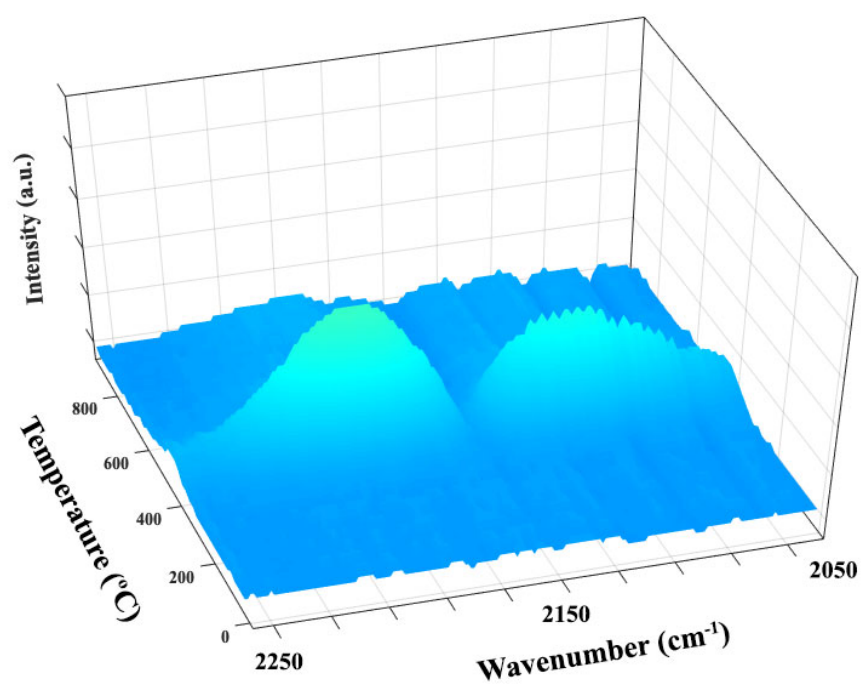

(e) 2050-2250  $\text{cm}^{-1}$  CO

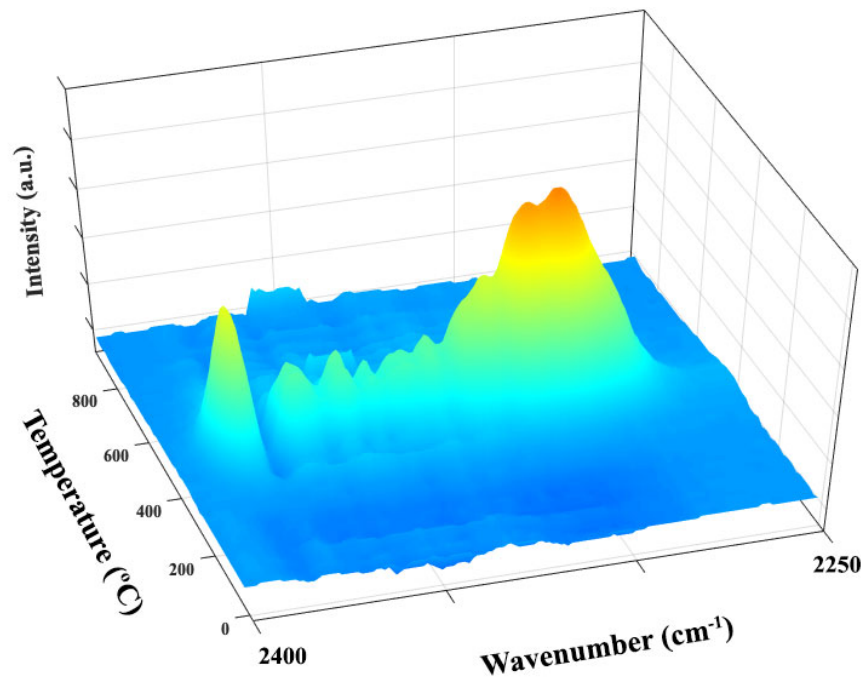

(f) 2250-2400  $\text{cm}^{-1}$   $\text{CO}_2$

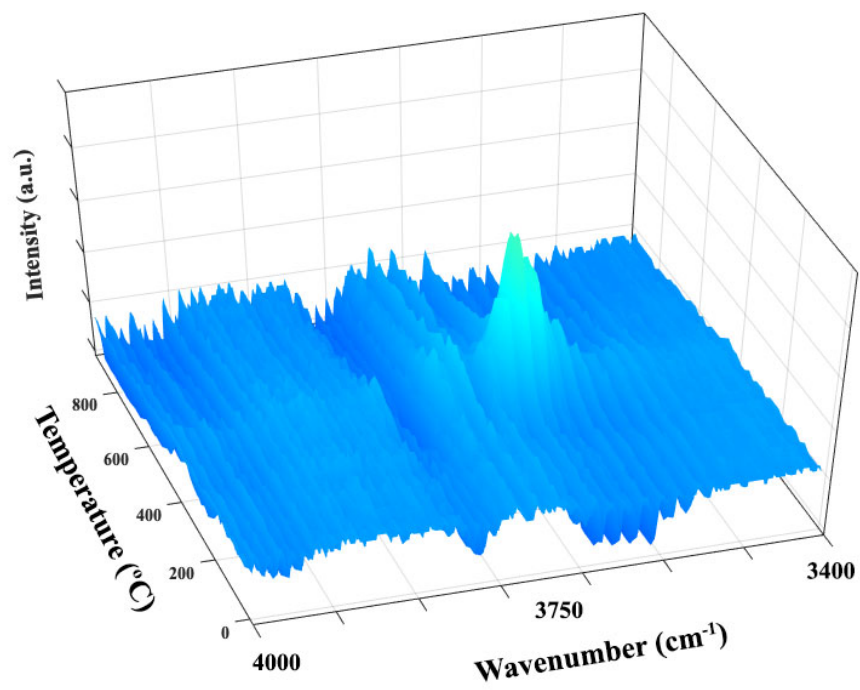

(g) 3400-4000  $\text{cm}^{-1}$  Hydrogen bond

**Figure S2:** 3D FT-IR profiles of the evolved gases released from flax straw during pyrolysis focused spectra in each region.

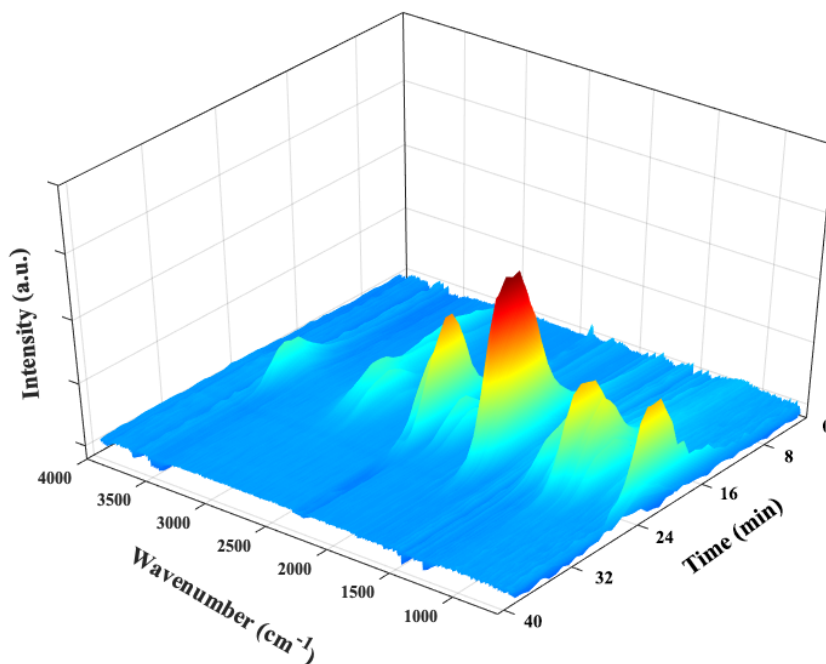

**Figure S3:** 3D FT-IR profiles of the evolved gases released from flax straw during pyrolysis (time based)

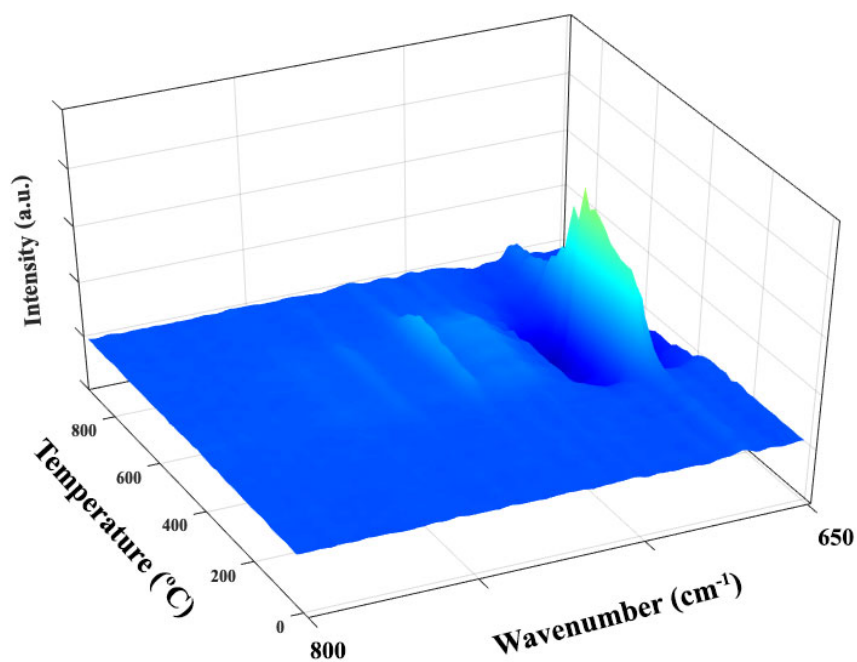

(a) 650-800  $\text{cm}^{-1}$  Aromatic Region

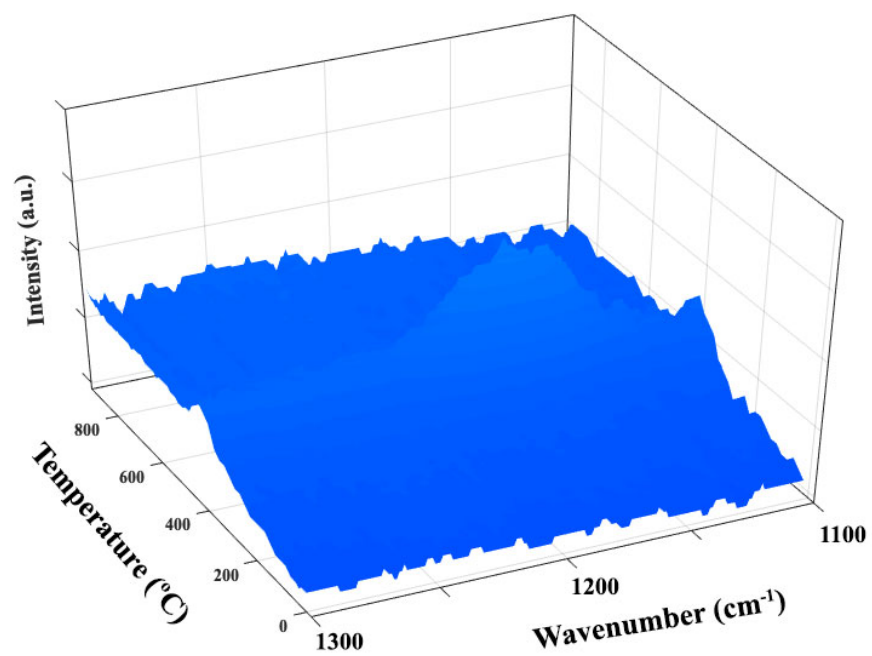

(b) 1100-1300  $\text{cm}^{-1}$  Ethers and Alcohols

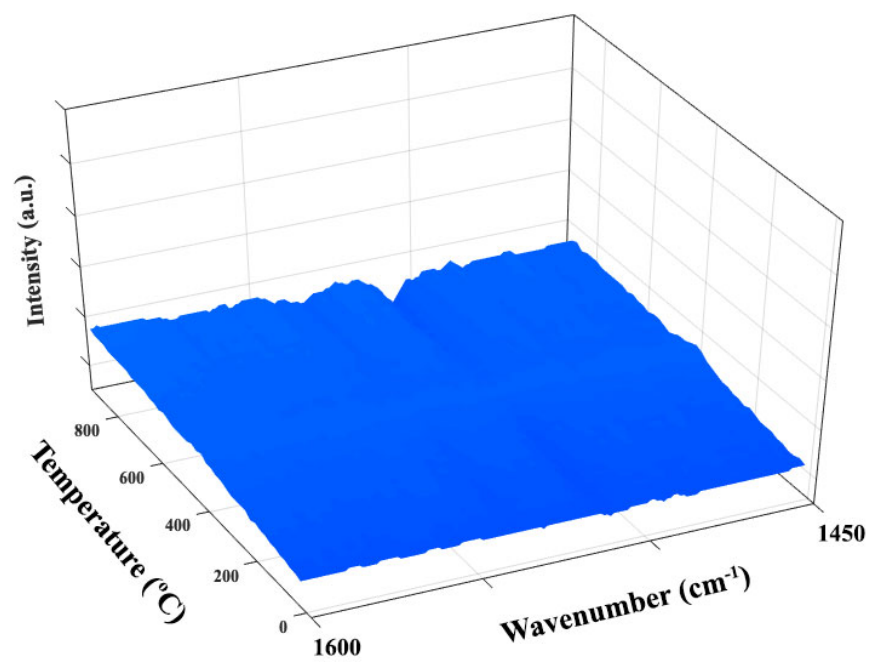

(c) 1450-1600  $\text{cm}^{-1}$  Aromatics

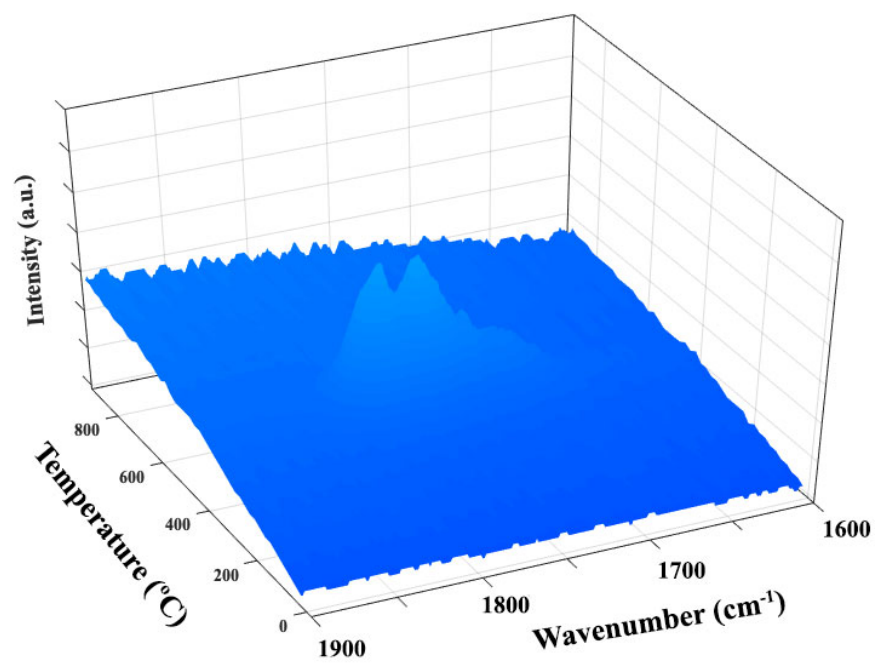

(d) 1600-1900  $\text{cm}^{-1}$  Carboxylic acids

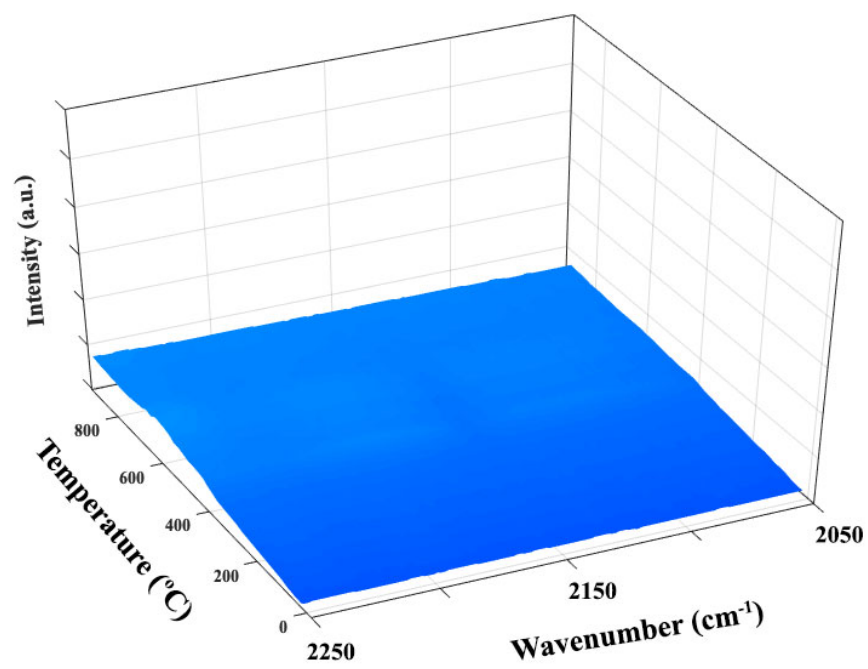

(e) 2050-2250 cm<sup>-1</sup> CO

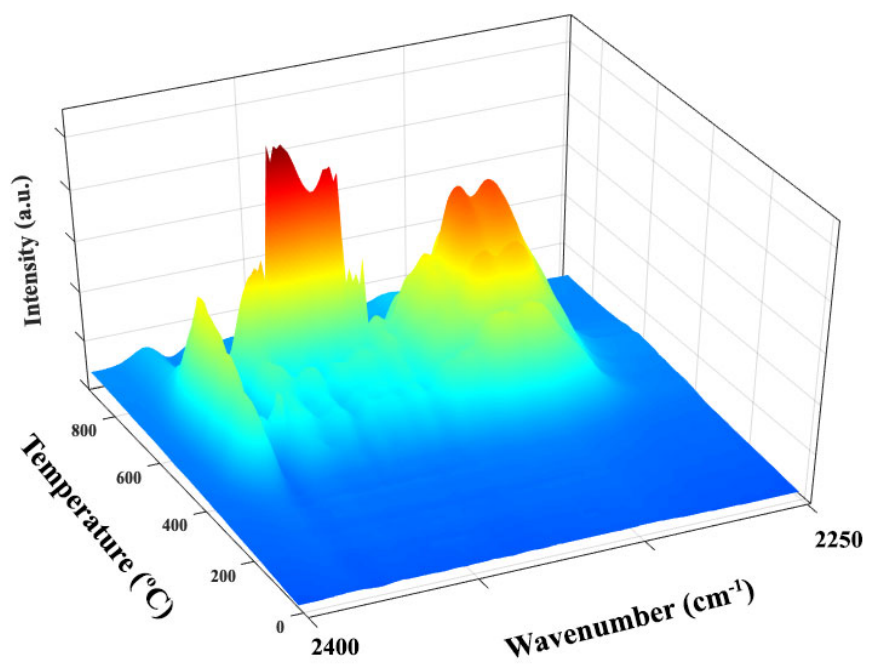

(f) 2250-2400 cm<sup>-1</sup> CO<sub>2</sub>

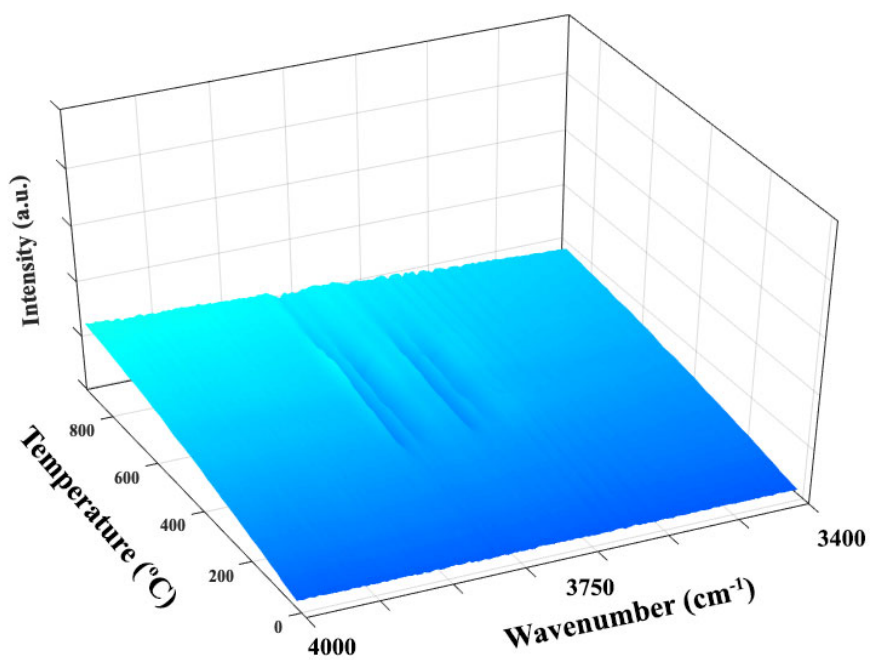

(g) 3400-4000  $\text{cm}^{-1}$  Hydrogen bond

**Figure S4:** 3D FT-IR profiles of the evolved gases released from flax straw during combustion focused spectra in each region

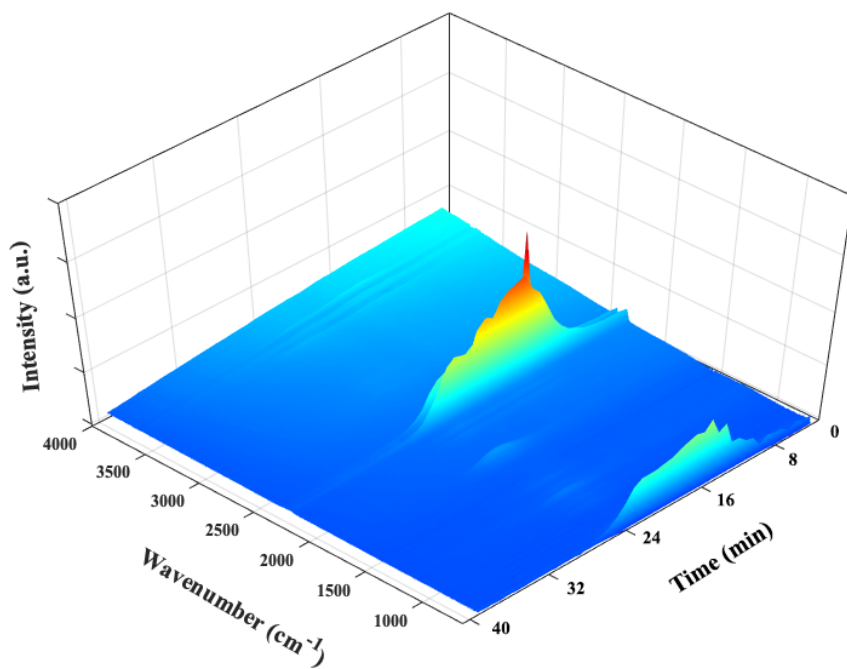

**Figure S5:** 3D FT-IR profiles of the evolved gases released from flax straw during combustion (time based)
